# Supplementary material for: Chronic Intermittent Hypoxia during Sleep Causes Browning of Interscapular Adipose Tissue Accompanied by Local Insulin Resistance in Mice
Source: MDPI journal article supplement (doi:10.3390/ijms232415462), 2022-12-07
Supplement: s1 [file s1]

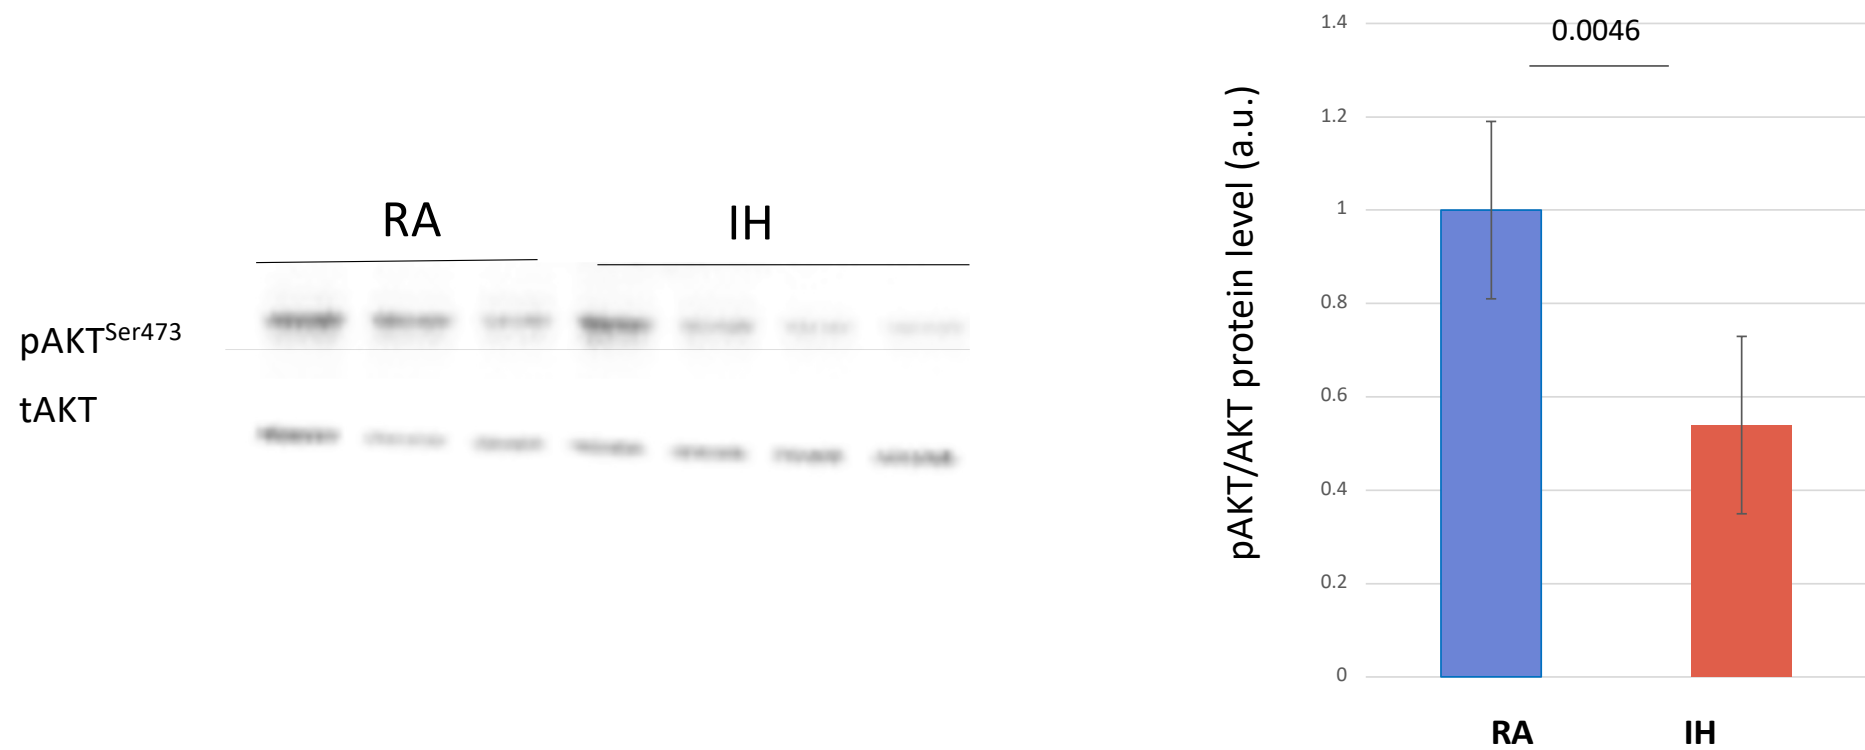

**Supplemental Figure S1:** Western Blot analysis of phosphorylated AKT(Ser473) protein levels normalized to total Akt in skeletal muscle following I.P insulin stimulation. (n=3-4)
